# Supplementary material for: Cloning and enhancing production of a detergent- and organic-solvent-resistant nattokinase from Bacillus subtilis VTCC-DVN-12-01 by using an eight-protease-gene-deficient Bacillus subtilis WB800
Source: Springer Nature journal article supplement (doi:10.1186/1475-2859-12-79), 2013-09-10
Supplement: 12934_2013_877_MOESM2_ESM.pdf [file 12934_2013_877_MOESM2_ESM.pdf]

**A** **AQSVPYGISQIK**

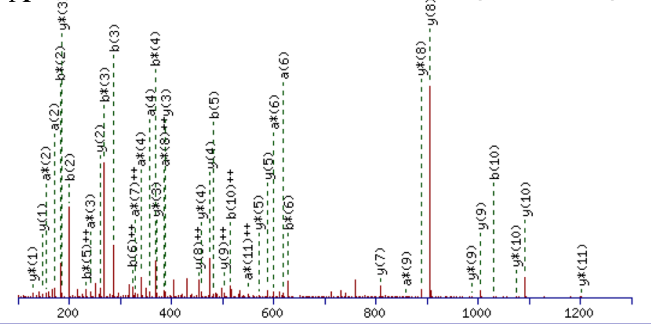

**B** **VAVIDSGIDSSHPDLNVR**

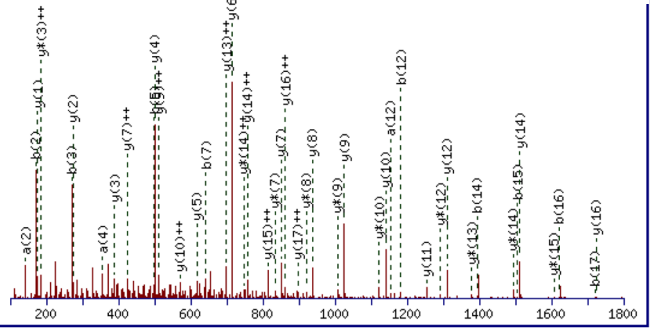

**C** **YPSTIAVGAVNSSNQR**

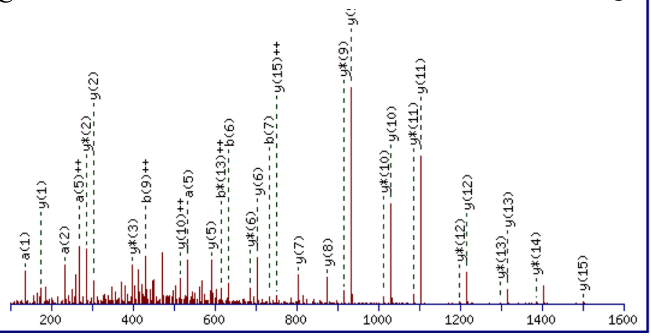

|                                                                                                                   |             |
|-------------------------------------------------------------------------------------------------------------------|-------------|
| AQSVPYGISQIKAPALHLSQGYTGSNVKVAVIDSGIDSSHPDLNVRGGASFVPSETNPYQDGSSHGTHVAGTIAALNNSIGVLGVAPSASLYAVKVLVDSTG            | Majority    |
| -----                                                                                                             | -----       |
| 10 20 30 40 50 60 70 80 90 100                                                                                    |             |
| 1 AQSVPYGISQIKAPALHLSQGYTGSNVKVAVIDSGIDSSHPDLNVRGGASFVPSETNPYQDGSSHGTHVAGTIAALNNSIGVLGVAPSASLYAVKVLVDSTG          | gil14422313 |
| 1 AQSVPYGISQIKAPALHLSQGYTGSNVKVAVIDSGIDSSHPDLNVRGGASFVPSETNPYQDGSSHGTHVAGTIAALNNSIGVLGVAPSASLYAVKVLVDSTG          | Nk          |
| 1 AQSVPYGISQIK-----VAVIDSGIDSSHPDLNVR-----                                                                        | Nk_frag     |
|                                                                                                                   |             |
| SGQYSWIIINGIEWAISNNMXVINMSLGGPSGSTALLKTVVDKAVSSGIWVAAAAGNEGSSGSSSTVGYPAKYPSTIAVGAVNSSNQRASFSSAGSELVDVMA           | Majority    |
| -----                                                                                                             | -----       |
| 110 120 130 140 150 160 170 180 190 200                                                                           |             |
| 101 SQQYSWIIINGIEWAISNNMGINMSLGGPSGSTALLKTVVDKAVSSGIWVAAAAGNEGSSGSSSTVGYPAKYPSTIAVGAVNSSNQRASFSSAGSELVDVMA        | gil14422313 |
| 101 SQQYSWIIINGIEWAISNNMVDVINMSLGGPSGSTALLKTVVDKAVSSGIWVAAAAGNEGSSGSSSTVGYPAKYPSTIAVGAVNSSNQRASFSSAGSELVDVMA      | Nk          |
| 31 SQQYSWIIINGIEWAISNNMVDVINMSLGGPSGSTALLKTVVDKAVSSGIWVAAAAGNEGSSGSSSTVGYPAKYPSTIAVGAVNSSNQR-----YPSTIAVGAVNSSNQR | Nk_frag     |
|                                                                                                                   |             |
| PGVSIQSTLPGGYGAYNGTSMATPHVAGAAALILSKHPTWTNAQVRDRLESTATYLGNSFYFGKGLINQVAAAQ                                        | Majority    |
| -----                                                                                                             | -----       |
| 210 220 230 240 250 260 270                                                                                       |             |
| 201 PGVSIQSTLPGGYGAYNGTSMATPHVAGAAALILSKHPTWTNAQVRDRLESTATYLGNSFYFGKGLINQVAAAQ                                    | gil14422313 |
| 201 PGVSIQSTLPGGYGAYNGTSMATPHVAGAAALILSKHPTWTNAQVRDRLESTATYLGNSFYFGKGLINQVAAAQ                                    | Nk          |
| 46 PGVSIQSTLPGGYGAYNGTSMATPHVAGAAALILSKHPTWTNAQVRDRLESTATYLGNSFYFGKGLINQVAAAQ                                     | Nk_frag     |
