# Supplementary figures and images for: Cloning and enhancing production of a detergent- and organic-solvent-resistant nattokinase from Bacillus subtilis VTCC-DVN-12-01 by using an eight-protease-gene-deficient Bacillus subtilis WB800
Source: Springer Nature journal article supplement (doi:10.1186/1475-2859-12-79), 2013-09-10

**A****1 2 3 4 5 6 7 8 9 M**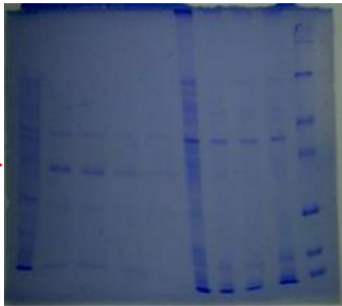**← 116****← 66****← 45****← 35****← 25****← 18****← 14****B****M 1**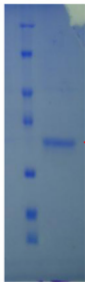**116****66****45****35****25****18****14**

Supplement: 12934_2013_877_MOESM1_ESM.pdf [file 12934_2013_877_MOESM1_ESM.pdf]

**A**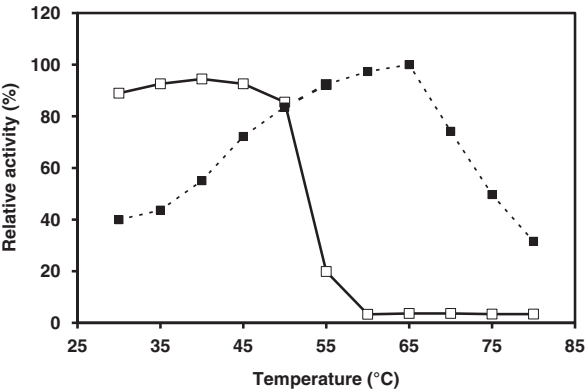**B**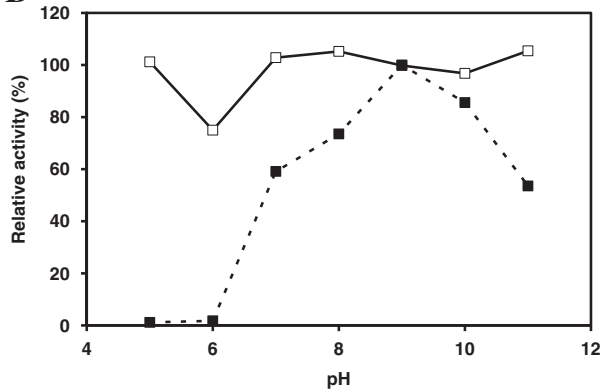

Supplement: 12934_2013_877_MOESM3_ESM.pdf [file 12934_2013_877_MOESM3_ESM.pdf]

**A**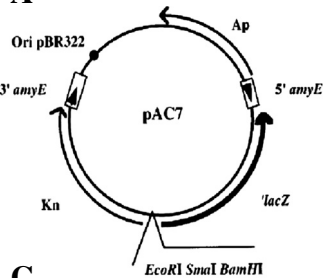**C**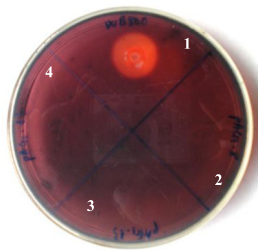**B**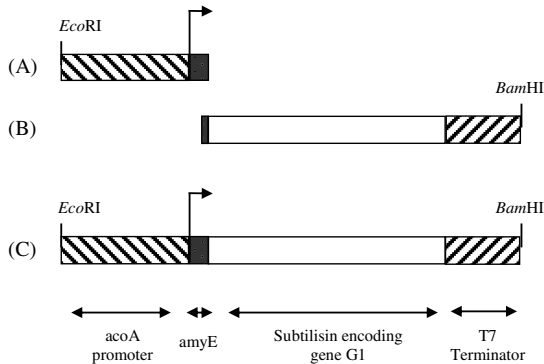

Supplement: 12934_2013_877_MOESM4_ESM.pdf [file 12934_2013_877_MOESM4_ESM.pdf]
